# Supplementary material for: Linking Acrosomal Morphotypes and Genetic Divergence in an Inter-Oceanic Mussel from Pacific and Atlantic Coasts: A Case of Incipient Speciation?
Source: Preprints.org preprint supplement (doi:10.20944/preprints202401.0956.v1), 2024-01-12
Supplement: Supplementary file 1 [file supplementary]

**Table S2.**

A) Post hoc Tukey test for mean Head length between all pair comparisons; Adj p is the adjusted p value. 1=Iquique, 2=Antofagasta, 3=Tumbes, 4=Lota, 5=Lebu, 6=Isla Mocha Punta los Piures, 7= Isla Mocha Faro Viejo, 8= Isla Mocha Caleta Derrumbe, 9= Mehuín, 10=Valdivia, 11=Pucatrihue, 12=Chiloé, 13=Punta Pirámide, 14=Puerto Madryn 15=Comodoro Rivadavia, 16=Punta Arenas.

| NORD | Effect | NLOC | _NLOC | Estimate  | StdErr  | DF  | tValue | Probt  | Adjustment | Adj p  |
|------|--------|------|-------|-----------|---------|-----|--------|--------|------------|--------|
| 1    | NLOC   | 1    | 2     | 62.8167   | 15.8861 | 464 | 3.95   | 0.0001 | Tukey      | 0.0086 |
| 2    | NLOC   | 1    | 3     | 43.3167   | 15.8861 | 464 | 2.73   | 0.0066 | Tukey      | 0.3168 |
| 3    | NLOC   | 1    | 4     | 43.9667   | 15.8861 | 464 | 2.77   | 0.0059 | Tukey      | 0.2917 |
| 4    | NLOC   | 1    | 5     | -50.1833  | 15.8861 | 464 | -3.16  | 0.0017 | Tukey      | 0.1150 |
| 5    | NLOC   | 1    | 6     | -211.8167 | 15.8861 | 464 | -13.33 | 0.0000 | Tukey      | 0.0000 |
| 6    | NLOC   | 1    | 7     | -270.5833 | 15.8861 | 464 | -17.03 | 0.0000 | Tukey      | 0.0000 |
| 7    | NLOC   | 1    | 8     | -175.8667 | 15.8861 | 464 | -11.07 | 0.0000 | Tukey      | 0.0000 |
| 8    | NLOC   | 1    | 9     | -63.4500  | 15.8861 | 464 | -3.99  | 0.0001 | Tukey      | 0.0074 |
| 9    | NLOC   | 1    | 10    | -298.6000 | 15.8861 | 464 | -18.80 | 0.0000 | Tukey      | 0.0000 |
| 10   | NLOC   | 1    | 11    | -209.3667 | 15.8861 | 464 | -13.18 | 0.0000 | Tukey      | 0.0000 |
| 11   | NLOC   | 1    | 12    | -300.3667 | 15.8861 | 464 | -18.91 | 0.0000 | Tukey      | 0.0000 |
| 12   | NLOC   | 1    | 13    | -195.4167 | 15.8861 | 464 | -12.30 | 0.0000 | Tukey      | 0.0000 |
| 13   | NLOC   | 1    | 14    | -178.4000 | 15.8861 | 464 | -11.23 | 0.0000 | Tukey      | 0.0000 |
| 14   | NLOC   | 1    | 15    | -162.6667 | 15.8861 | 464 | -10.24 | 0.0000 | Tukey      | 0.0000 |
| 15   | NLOC   | 1    | 16    | -289.3833 | 15.8861 | 464 | -18.22 | 0.0000 | Tukey      | 0.0000 |
| 16   | NLOC   | 2    | 3     | -19.5000  | 15.8861 | 464 | -1.23  | 0.2203 | Tukey      | 0.9977 |
| 17   | NLOC   | 2    | 4     | -18.8500  | 15.8861 | 464 | -1.19  | 0.2360 | Tukey      | 0.9985 |
| 18   | NLOC   | 2    | 5     | -113.0000 | 15.8861 | 464 | -7.11  | 0.0000 | Tukey      | 0.0000 |
| 19   | NLOC   | 2    | 6     | -274.6333 | 15.8861 | 464 | -17.29 | 0.0000 | Tukey      | 0.0000 |
| 20   | NLOC   | 2    | 7     | -333.4000 | 15.8861 | 464 | -20.99 | 0.0000 | Tukey      | 0.0000 |
| 21   | NLOC   | 2    | 8     | -238.6833 | 15.8861 | 464 | -15.02 | 0.0000 | Tukey      | 0.0000 |
| 22   | NLOC   | 2    | 9     | -126.2667 | 15.8861 | 464 | -7.95  | 0.0000 | Tukey      | 0.0000 |
| 23   | NLOC   | 2    | 10    | -361.4167 | 15.8861 | 464 | -22.75 | 0.0000 | Tukey      | 0.0000 |
| 24   | NLOC   | 2    | 11    | -272.1833 | 15.8861 | 464 | -17.13 | 0.0000 | Tukey      | 0.0000 |
| 25   | NLOC   | 2    | 12    | -363.1833 | 15.8861 | 464 | -22.86 | 0.0000 | Tukey      | 0.0000 |
| 26   | NLOC   | 2    | 13    | -258.2333 | 15.8861 | 464 | -16.26 | 0.0000 | Tukey      | 0.0000 |
| 27   | NLOC   | 2    | 14    | -241.2167 | 15.8861 | 464 | -15.18 | 0.0000 | Tukey      | 0.0000 |
| 28   | NLOC   | 2    | 15    | -225.4833 | 15.8861 | 464 | -14.19 | 0.0000 | Tukey      | 0.0000 |
| 29   | NLOC   | 2    | 16    | -352.2000 | 15.8861 | 464 | -22.17 | 0.0000 | Tukey      | 0.0000 |
| 30   | NLOC   | 3    | 4     | 0.6500    | 15.8861 | 464 | 0.04   | 0.9674 | Tukey      | 1.0000 |
| 31   | NLOC   | 3    | 5     | -93.5000  | 15.8861 | 464 | -5.89  | 0.0000 | Tukey      | 0.0000 |
| 32   | NLOC   | 3    | 6     | -255.1333 | 15.8861 | 464 | -16.06 | 0.0000 | Tukey      | 0.0000 |
| 33   | NLOC   | 3    | 7     | -313.9000 | 15.8861 | 464 | -19.76 | 0.0000 | Tukey      | 0.0000 |
| 34   | NLOC   | 3    | 8     | -219.1833 | 15.8861 | 464 | -13.80 | 0.0000 | Tukey      | 0.0000 |
| 35   | NLOC   | 3    | 9     | -106.7667 | 15.8861 | 464 | -6.72  | 0.0000 | Tukey      | 0.0000 |
| 36   | NLOC   | 3    | 10    | -341.9167 | 15.8861 | 464 | -21.52 | 0.0000 | Tukey      | 0.0000 |

|    |      |   |    |           |         |     |        |        |       |        |
|----|------|---|----|-----------|---------|-----|--------|--------|-------|--------|
| 37 | NLOC | 3 | 11 | -252.6833 | 15.8861 | 464 | -15.91 | 0.0000 | Tukey | 0.0000 |
| 38 | NLOC | 3 | 12 | -343.6833 | 15.8861 | 464 | -21.63 | 0.0000 | Tukey | 0.0000 |
| 39 | NLOC | 3 | 13 | -238.7333 | 15.8861 | 464 | -15.03 | 0.0000 | Tukey | 0.0000 |
| 40 | NLOC | 3 | 14 | -221.7167 | 15.8861 | 464 | -13.96 | 0.0000 | Tukey | 0.0000 |
| 41 | NLOC | 3 | 15 | -205.9833 | 15.8861 | 464 | -12.97 | 0.0000 | Tukey | 0.0000 |
| 42 | NLOC | 3 | 16 | -332.7000 | 15.8861 | 464 | -20.94 | 0.0000 | Tukey | 0.0000 |
| 43 | NLOC | 4 | 5  | -94.1500  | 15.8861 | 464 | -5.93  | 0.0000 | Tukey | 0.0000 |
| 44 | NLOC | 4 | 6  | -255.7833 | 15.8861 | 464 | -16.10 | 0.0000 | Tukey | 0.0000 |
| 45 | NLOC | 4 | 7  | -314.5500 | 15.8861 | 464 | -19.80 | 0.0000 | Tukey | 0.0000 |
| 46 | NLOC | 4 | 8  | -219.8333 | 15.8861 | 464 | -13.84 | 0.0000 | Tukey | 0.0000 |
| 47 | NLOC | 4 | 9  | -107.4167 | 15.8861 | 464 | -6.76  | 0.0000 | Tukey | 0.0000 |
| 48 | NLOC | 4 | 10 | -342.5667 | 15.8861 | 464 | -21.56 | 0.0000 | Tukey | 0.0000 |
| 49 | NLOC | 4 | 11 | -253.3333 | 15.8861 | 464 | -15.95 | 0.0000 | Tukey | 0.0000 |
| 50 | NLOC | 4 | 12 | -344.3333 | 15.8861 | 464 | -21.68 | 0.0000 | Tukey | 0.0000 |
| 51 | NLOC | 4 | 13 | -239.3833 | 15.8861 | 464 | -15.07 | 0.0000 | Tukey | 0.0000 |
| 52 | NLOC | 4 | 14 | -222.3667 | 15.8861 | 464 | -14.00 | 0.0000 | Tukey | 0.0000 |
| 53 | NLOC | 4 | 15 | -206.6333 | 15.8861 | 464 | -13.01 | 0.0000 | Tukey | 0.0000 |
| 54 | NLOC | 4 | 16 | -333.3500 | 15.8861 | 464 | -20.98 | 0.0000 | Tukey | 0.0000 |
| 55 | NLOC | 5 | 6  | -161.6333 | 15.8861 | 464 | -10.17 | 0.0000 | Tukey | 0.0000 |
| 56 | NLOC | 5 | 7  | -220.4000 | 15.8861 | 464 | -13.87 | 0.0000 | Tukey | 0.0000 |
| 57 | NLOC | 5 | 8  | -125.6833 | 15.8861 | 464 | -7.91  | 0.0000 | Tukey | 0.0000 |
| 58 | NLOC | 5 | 9  | -13.2667  | 15.8861 | 464 | -0.84  | 0.4041 | Tukey | 1.0000 |
| 59 | NLOC | 5 | 10 | -248.4167 | 15.8861 | 464 | -15.64 | 0.0000 | Tukey | 0.0000 |
| 60 | NLOC | 5 | 11 | -159.1833 | 15.8861 | 464 | -10.02 | 0.0000 | Tukey | 0.0000 |
| 61 | NLOC | 5 | 12 | -250.1833 | 15.8861 | 464 | -15.75 | 0.0000 | Tukey | 0.0000 |
| 62 | NLOC | 5 | 13 | -145.2333 | 15.8861 | 464 | -9.14  | 0.0000 | Tukey | 0.0000 |
| 63 | NLOC | 5 | 14 | -128.2167 | 15.8861 | 464 | -8.07  | 0.0000 | Tukey | 0.0000 |
| 64 | NLOC | 5 | 15 | -112.4833 | 15.8861 | 464 | -7.08  | 0.0000 | Tukey | 0.0000 |
| 65 | NLOC | 5 | 16 | -239.2000 | 15.8861 | 464 | -15.06 | 0.0000 | Tukey | 0.0000 |
| 66 | NLOC | 6 | 7  | -58.7667  | 15.8861 | 464 | -3.70  | 0.0002 | Tukey | 0.0217 |
| 67 | NLOC | 6 | 8  | 35.9500   | 15.8861 | 464 | 2.26   | 0.0241 | Tukey | 0.6514 |
| 68 | NLOC | 6 | 9  | 148.3667  | 15.8861 | 464 | 9.34   | 0.0000 | Tukey | 0.0000 |
| 69 | NLOC | 6 | 10 | -86.7833  | 15.8861 | 464 | -5.46  | 0.0000 | Tukey | 0.0000 |
| 70 | NLOC | 6 | 11 | 2.4500    | 15.8861 | 464 | 0.15   | 0.8775 | Tukey | 1.0000 |
| 71 | NLOC | 6 | 12 | -88.5500  | 15.8861 | 464 | -5.57  | 0.0000 | Tukey | 0.0000 |
| 72 | NLOC | 6 | 13 | 16.4000   | 15.8861 | 464 | 1.03   | 0.3024 | Tukey | 0.9997 |
| 73 | NLOC | 6 | 14 | 33.4167   | 15.8861 | 464 | 2.10   | 0.0360 | Tukey | 0.7621 |
| 74 | NLOC | 6 | 15 | 49.1500   | 15.8861 | 464 | 3.09   | 0.0021 | Tukey | 0.1365 |
| 75 | NLOC | 6 | 16 | -77.5667  | 15.8861 | 464 | -4.88  | 0.0000 | Tukey | 0.0002 |
| 76 | NLOC | 7 | 8  | 94.7167   | 15.8861 | 464 | 5.96   | 0.0000 | Tukey | 0.0000 |
| 77 | NLOC | 7 | 9  | 207.1333  | 15.8861 | 464 | 13.04  | 0.0000 | Tukey | 0.0000 |
| 78 | NLOC | 7 | 10 | -28.0167  | 15.8861 | 464 | -1.76  | 0.0785 | Tukey | 0.9278 |
| 79 | NLOC | 7 | 11 | 61.2167   | 15.8861 | 464 | 3.85   | 0.0001 | Tukey | 0.0125 |

|     |      |    |    |           |         |     |        |        |       |        |
|-----|------|----|----|-----------|---------|-----|--------|--------|-------|--------|
| 80  | NLOC | 7  | 12 | -29.7833  | 15.8861 | 464 | -1.87  | 0.0614 | Tukey | 0.8861 |
| 81  | NLOC | 7  | 13 | 75.1667   | 15.8861 | 464 | 4.73   | 0.0000 | Tukey | 0.0003 |
| 82  | NLOC | 7  | 14 | 92.1833   | 15.8861 | 464 | 5.80   | 0.0000 | Tukey | 0.0000 |
| 83  | NLOC | 7  | 15 | 107.9167  | 15.8861 | 464 | 6.79   | 0.0000 | Tukey | 0.0000 |
| 84  | NLOC | 7  | 16 | -18.8000  | 15.8861 | 464 | -1.18  | 0.2372 | Tukey | 0.9985 |
| 85  | NLOC | 8  | 9  | 112.4167  | 15.8861 | 464 | 7.08   | 0.0000 | Tukey | 0.0000 |
| 86  | NLOC | 8  | 10 | -122.7333 | 15.8861 | 464 | -7.73  | 0.0000 | Tukey | 0.0000 |
| 87  | NLOC | 8  | 11 | -33.5000  | 15.8861 | 464 | -2.11  | 0.0355 | Tukey | 0.7587 |
| 88  | NLOC | 8  | 12 | -124.5000 | 15.8861 | 464 | -7.84  | 0.0000 | Tukey | 0.0000 |
| 89  | NLOC | 8  | 13 | -19.5500  | 15.8861 | 464 | -1.23  | 0.2191 | Tukey | 0.9977 |
| 90  | NLOC | 8  | 14 | -2.5333   | 15.8861 | 464 | -0.16  | 0.8734 | Tukey | 1.0000 |
| 91  | NLOC | 8  | 15 | 13.2000   | 15.8861 | 464 | 0.83   | 0.4064 | Tukey | 1.0000 |
| 92  | NLOC | 8  | 16 | -113.5167 | 15.8861 | 464 | -7.15  | 0.0000 | Tukey | 0.0000 |
| 93  | NLOC | 9  | 10 | -235.1500 | 15.8861 | 464 | -14.80 | 0.0000 | Tukey | 0.0000 |
| 94  | NLOC | 9  | 11 | -145.9167 | 15.8861 | 464 | -9.19  | 0.0000 | Tukey | 0.0000 |
| 95  | NLOC | 9  | 12 | -236.9167 | 15.8861 | 464 | -14.91 | 0.0000 | Tukey | 0.0000 |
| 96  | NLOC | 9  | 13 | -131.9667 | 15.8861 | 464 | -8.31  | 0.0000 | Tukey | 0.0000 |
| 97  | NLOC | 9  | 14 | -114.9500 | 15.8861 | 464 | -7.24  | 0.0000 | Tukey | 0.0000 |
| 98  | NLOC | 9  | 15 | -99.2167  | 15.8861 | 464 | -6.25  | 0.0000 | Tukey | 0.0000 |
| 99  | NLOC | 9  | 16 | -225.9333 | 15.8861 | 464 | -14.22 | 0.0000 | Tukey | 0.0000 |
| 100 | NLOC | 10 | 11 | 89.2333   | 15.8861 | 464 | 5.62   | 0.0000 | Tukey | 0.0000 |
| 101 | NLOC | 10 | 12 | -1.7667   | 15.8861 | 464 | -0.11  | 0.9115 | Tukey | 1.0000 |
| 102 | NLOC | 10 | 13 | 103.1833  | 15.8861 | 464 | 6.50   | 0.0000 | Tukey | 0.0000 |
| 103 | NLOC | 10 | 14 | 120.2000  | 15.8861 | 464 | 7.57   | 0.0000 | Tukey | 0.0000 |
| 104 | NLOC | 10 | 15 | 135.9333  | 15.8861 | 464 | 8.56   | 0.0000 | Tukey | 0.0000 |
| 105 | NLOC | 10 | 16 | 9.2167    | 15.8861 | 464 | 0.58   | 0.5621 | Tukey | 1.0000 |
| 106 | NLOC | 11 | 12 | -91.0000  | 15.8861 | 464 | -5.73  | 0.0000 | Tukey | 0.0000 |
| 107 | NLOC | 11 | 13 | 13.9500   | 15.8861 | 464 | 0.88   | 0.3803 | Tukey | 1.0000 |
| 108 | NLOC | 11 | 14 | 30.9667   | 15.8861 | 464 | 1.95   | 0.0519 | Tukey | 0.8512 |
| 109 | NLOC | 11 | 15 | 46.7000   | 15.8861 | 464 | 2.94   | 0.0034 | Tukey | 0.1999 |
| 110 | NLOC | 11 | 16 | -80.0167  | 15.8861 | 464 | -5.04  | 0.0000 | Tukey | 0.0001 |
| 111 | NLOC | 12 | 13 | 104.9500  | 15.8861 | 464 | 6.61   | 0.0000 | Tukey | 0.0000 |
| 112 | NLOC | 12 | 14 | 121.9667  | 15.8861 | 464 | 7.68   | 0.0000 | Tukey | 0.0000 |
| 113 | NLOC | 12 | 15 | 137.7000  | 15.8861 | 464 | 8.67   | 0.0000 | Tukey | 0.0000 |
| 114 | NLOC | 12 | 16 | 10.9833   | 15.8861 | 464 | 0.69   | 0.4897 | Tukey | 1.0000 |
| 115 | NLOC | 13 | 14 | 17.0167   | 15.8861 | 464 | 1.07   | 0.2847 | Tukey | 0.9995 |
| 116 | NLOC | 13 | 15 | 32.7500   | 15.8861 | 464 | 2.06   | 0.0398 | Tukey | 0.7884 |
| 117 | NLOC | 13 | 16 | -93.9667  | 15.8861 | 464 | -5.92  | 0.0000 | Tukey | 0.0000 |
| 118 | NLOC | 14 | 15 | 15.7333   | 15.8861 | 464 | 0.99   | 0.3225 | Tukey | 0.9998 |
| 119 | NLOC | 14 | 16 | -110.9833 | 15.8861 | 464 | -6.99  | 0.0000 | Tukey | 0.0000 |
| 120 | NLOC | 15 | 16 | -126.7167 | 15.8861 | 464 | -7.98  | 0.0000 | Tukey | 0.0000 |

**B) Matrix for pairwise comparisons of the Adjusted P value of mean Head length. Sample codes in Table 1**

| Locality | IQQ    | ANT    | TUMB   | LOTA   | LEBU   | IMLP   | IMFV   | IMCD   | MEH    | VALD   | PUCA   | CHIL   | PIR    | PM     | CR     | PARE   |
|----------|--------|--------|--------|--------|--------|--------|--------|--------|--------|--------|--------|--------|--------|--------|--------|--------|
| IQQ      | 1      | 0.0086 | 0.3168 | 0.2917 | 0.1150 | 0.0000 | 0.0000 | 0.0000 | 0.0074 | 0.0000 | 0.0000 | 0.0000 | 0.0000 | 0.0000 | 0.0000 | 0.0000 |
| ANT      | 0.0086 | 1      | 0.9977 | 0.9985 | 0.0000 | 0.0000 | 0.0000 | 0.0000 | 0.0000 | 0.0000 | 0.0000 | 0.0000 | 0.0000 | 0.0000 | 0.0000 | 0.0000 |
| TUMB     | 0.3168 | 0.9977 | 1      | 1.0000 | 0.0000 | 0.0000 | 0.0000 | 0.0000 | 0.0000 | 0.0000 | 0.0000 | 0.0000 | 0.0000 | 0.0000 | 0.0000 | 0.0000 |
| LOTA     | 0.2917 | 0.9985 | 1.0000 | 1      | 0.0000 | 0.0000 | 0.0000 | 0.0000 | 0.0000 | 0.0000 | 0.0000 | 0.0000 | 0.0000 | 0.0000 | 0.0000 | 0.0000 |
| LEBU     | 0.1150 | 0.0000 | 0.0000 | 0.0000 | 1      | 0.0000 | 0.0000 | 0.0000 | 1.0000 | 0.0000 | 0.0000 | 0.0000 | 0.0000 | 0.0000 | 0.0000 | 0.0000 |
| IMLP     | 0.0000 | 0.0000 | 0.0000 | 0.0000 | 0.0000 | 1      | 0.0217 | 0.6514 | 0.0000 | 0.0000 | 1.0000 | 0.0000 | 0.9997 | 0.7621 | 0.1365 | 0.0002 |
| IMFV     | 0.0000 | 0.0000 | 0.0000 | 0.0000 | 0.0000 | 0.0217 | 1      | 0.0000 | 0.0000 | 0.9278 | 0.0125 | 0.8861 | 0.0003 | 0.0000 | 0.0000 | 0.9985 |
| IMCD     | 0.0000 | 0.0000 | 0.0000 | 0.0000 | 0.0000 | 0.6514 | 0.0000 | 1      | 0.0000 | 0.0000 | 0.7587 | 0.0000 | 0.9977 | 1.0000 | 1.0000 | 0.0000 |
| MEH      | 0.0074 | 0.0000 | 0.0000 | 0.0000 | 1.0000 | 0.0000 | 0.0000 | 0.0000 | 1      | 0.0000 | 0.0000 | 0.0000 | 0.0000 | 0.0000 | 0.0000 | 0.0000 |
| VALD     | 0.0000 | 0.0000 | 0.0000 | 0.0000 | 0.0000 | 0.0000 | 0.9278 | 0.0000 | 0.0000 | 1      | 0.0000 | 1.0000 | 0.0000 | 0.0000 | 0.0000 | 1.0000 |
| PUCA     | 0.0000 | 0.0000 | 0.0000 | 0.0000 | 0.0000 | 1.0000 | 0.0125 | 0.7587 | 0.0000 | 0.0000 | 1      | 0.0000 | 1.0000 | 0.8512 | 0.1999 | 0.0001 |
| CHIL     | 0.0000 | 0.0000 | 0.0000 | 0.0000 | 0.0000 | 0.0000 | 0.8861 | 0.0000 | 0.0000 | 1.0000 | 0.0000 | 1      | 0.0000 | 0.0000 | 0.0000 | 1.0000 |
| PIR      | 0.0000 | 0.0000 | 0.0000 | 0.0000 | 0.0000 | 0.9997 | 0.0003 | 0.9977 | 0.0000 | 0.0000 | 1.0000 | 0.0000 | 1      | 0.9995 | 0.7884 | 0.0000 |
| PM       | 0.0000 | 0.0000 | 0.0000 | 0.0000 | 0.0000 | 0.7621 | 0.0000 | 1.0000 | 0.0000 | 0.0000 | 0.8512 | 0.0000 | 0.9995 | 1      | 0.9998 | 0.0000 |
| CR       | 0.0000 | 0.0000 | 0.0000 | 0.0000 | 0.0000 | 0.1365 | 0.0000 | 1.0000 | 0.0000 | 0.0000 | 0.1999 | 0.0000 | 0.7884 | 0.9998 | 1      | 0.0000 |
| PARE     | 0.0000 | 0.0000 | 0.0000 | 0.0000 | 0.0000 | 0.0002 | 0.9985 | 0.0000 | 0.0000 | 1.0000 | 0.0001 | 1.0000 | 0.0000 | 0.0000 | 0.0000 | 1      |
