# Supplementary material for: Linking Acrosomal Morphotypes and Genetic Divergence in an Inter-Oceanic Mussel from Pacific and Atlantic Coasts: A Case of Incipient Speciation?
Source: Preprints.org preprint supplement (doi:10.20944/preprints202401.0956.v1), 2024-01-12
Supplement: Supplementary file 2 [file supplementary]

**Table S3.**

**A)** Post hoc Tukey test for mean Acrosome length between all pair comparisons from northern localities: 1=Iquique, 2=Antofagasta, 3=Tumbes, 4=Lota; Adj p is the adjusted p value.

| Effect | NLOC | NLOC | Estimate     | StdErr      | DF  | tValue | Probt  | Adjustment   | Adj p  | Alpha | Lower        | Upper        | AdjLower     | AdjUpper     |
|--------|------|------|--------------|-------------|-----|--------|--------|--------------|--------|-------|--------------|--------------|--------------|--------------|
| NLOC   | 1    | 2    | 0.000182667  | 0.025999937 | 115 | 0.01   | 0.9944 | Tukey-Kramer | 1.0000 | 0.05  | -0.051318205 | 0.051683539  | -0.067599064 | 0.067964398  |
| NLOC   | 1    | 3    | 0.019859579  | 0.023268953 | 115 | 0.85   | 0.3952 | Tukey-Kramer | 0.8286 | 0.05  | -0.026231739 | 0.065950897  | -0.040802487 | 0.080521645  |
| NLOC   | 1    | 4    | -0.086856826 | 0.02337474  | 115 | -3.72  | 0.0003 | Tukey-Kramer | 0.0018 | 0.05  | -0.133157687 | -0.040555964 | -0.147794677 | -0.025918974 |
| NLOC   | 2    | 3    | 0.019676912  | 0.021037779 | 115 | 0.94   | 0.3516 | Tukey-Kramer | 0.7859 | 0.05  | -0.021994879 | 0.061348703  | -0.035168492 | 0.074522316  |
| NLOC   | 2    | 4    | -0.087039493 | 0.020987093 | 115 | -4.15  | 0.0001 | Tukey-Kramer | 0.0004 | 0.05  | -0.128610885 | -0.045468101 | -0.141752758 | -0.032326227 |
| NLOC   | 3    | 4    | -0.106716405 | 0.020447704 | 115 | -5.22  | 0.0000 | Tukey-Kramer | 0.0000 | 0.05  | -0.14721937  | -0.066213439 | -0.160023484 | -0.053409325 |

**B)** Least square means of Acrosome length between from northern localities. Sample codes in Table 1

| Effect | NLOC | Estimate    | StdErr      | DF  | tValue | Probt  | Alpha | Lower       | Upper |
|--------|------|-------------|-------------|-----|--------|--------|-------|-------------|-------|
| NLOC   | 1    | 1.081168985 | 0.017368117 | 115 | 62.25  | 0.0000 | 0.05  | 1.046766088 | 1.116 |
| NLOC   | 2    | 1.080986318 | 0.015825845 | 115 | 68.31  | 0.0000 | 0.05  | 1.049638365 | 1.112 |
| NLOC   | 3    | 1.061309406 | 0.014533818 | 115 | 73.02  | 0.0000 | 0.05  | 1.03252071  | 1.09  |
| NLOC   | 4    | 1.168025811 | 0.014557916 | 115 | 80.23  | 0.0000 | 0.05  | 1.139189381 | 1.197 |
