# Supplementary material for: Linking Acrosomal Morphotypes and Genetic Divergence in an Inter-Oceanic Mussel from Pacific and Atlantic Coasts: A Case of Incipient Speciation?
Source: Preprints.org preprint supplement (doi:10.20944/preprints202401.0956.v1), 2024-01-12
Supplement: Supplementary file 3 [file supplementary]

Table S4.

A) Post hoc Tukey test for mean Acrosome length between all pair comparisons from southern localities: 5=Lebu, 6=Isla Mocha Punta los Piures, 7= Isla Mocha Faro Viejo, 8= Isla Mocha Caleta Derrumbe, 9= Mehuín, 10=Valdivia, 11=Pucatrihue, 12=Chiloé, 13=Punta Pirámide, 14=Puerto Madryn 15=Comodoro Rivadavia, 16=Punta Arenas.

| nord | Effect | NLOC | _NLOC | Estimate    | StdErr     | DF  | tValue | Probt  | Adjustment   | AdjP   | Alpha | Lower       | Upper       | AdjLower    | AdjUpper    |
|------|--------|------|-------|-------------|------------|-----|--------|--------|--------------|--------|-------|-------------|-------------|-------------|-------------|
| 1    | NLOC   | 5    | 6     | 0.3388801   | 0.04055134 | 346 | 8.36   | 0.0000 | Tukey-Kramer | 0.0000 | 0.05  | 0.25912195  | 0.41863825  | 0.20544018  | 0.47232001  |
| 2    | NLOC   | 5    | 7     | 0.37966875  | 0.04397879 | 346 | 8.63   | 0.0000 | Tukey-Kramer | 0.0000 | 0.05  | 0.29316933  | 0.46616818  | 0.23495031  | 0.5243872   |
| 3    | NLOC   | 5    | 8     | 0.4554613   | 0.03882934 | 346 | 11.73  | 0.0000 | Tukey-Kramer | 0.0000 | 0.05  | 0.37909006  | 0.53183255  | 0.32768787  | 0.58323473  |
| 4    | NLOC   | 5    | 9     | 0.09994597  | 0.03522579 | 346 | 2.84   | 0.0048 | Tukey-Kramer | 0.1692 | 0.05  | 0.03066234  | 0.1692296   | -0.01596948 | 0.21586142  |
| 5    | NLOC   | 5    | 10    | 0.39201274  | 0.04442377 | 346 | 8.82   | 0.0000 | Tukey-Kramer | 0.0000 | 0.05  | 0.30463812  | 0.47938736  | 0.24583005  | 0.53819544  |
| 6    | NLOC   | 5    | 11    | 0.42511332  | 0.04021913 | 346 | 10.57  | 0.0000 | Tukey-Kramer | 0.0000 | 0.05  | 0.34600856  | 0.50421807  | 0.29276657  | 0.55746006  |
| 7    | NLOC   | 5    | 12    | -0.07541175 | 0.04558863 | 346 | -1.65  | 0.0990 | Tukey-Kramer | 0.8872 | 0.05  | -0.16507747 | 0.01425397  | -0.22542759 | 0.07460408  |
| 8    | NLOC   | 5    | 13    | 0.33320882  | 0.03972342 | 346 | 8.39   | 0.0000 | Tukey-Kramer | 0.0000 | 0.05  | 0.25507906  | 0.41133858  | 0.20249329  | 0.46392435  |
| 9    | NLOC   | 5    | 14    | 0.28167105  | 0.03883339 | 346 | 7.25   | 0.0000 | Tukey-Kramer | 0.0000 | 0.05  | 0.20529183  | 0.35805027  | 0.15388428  | 0.40945781  |
| 10   | NLOC   | 5    | 15    | 0.09057598  | 0.03818164 | 346 | 2.37   | 0.0182 | Tukey-Kramer | 0.4279 | 0.05  | 0.01547865  | 0.16567331  | -0.03506611 | 0.21621807  |
| 11   | NLOC   | 5    | 16    | -0.14278683 | 0.04497408 | 346 | -3.17  | 0.0016 | Tukey-Kramer | 0.0701 | 0.05  | -0.23124383 | -0.05432983 | -0.29078042 | 0.00520675  |
| 12   | NLOC   | 6    | 7     | 0.04078866  | 0.03566801 | 346 | 1.14   | 0.2536 | Tukey-Kramer | 0.9924 | 0.05  | -0.02936476 | 0.11094207  | -0.07658199 | 0.1581593   |
| 13   | NLOC   | 6    | 8     | 0.1165812   | 0.0353207  | 346 | 3.30   | 0.0011 | Tukey-Kramer | 0.0485 | 0.05  | 0.04711091  | 0.1860515   | 0.00035345  | 0.23280895  |
| 14   | NLOC   | 6    | 9     | -0.23893413 | 0.03928845 | 346 | -6.08  | 0.0000 | Tukey-Kramer | 0.0000 | 0.05  | -0.31620838 | -0.16165988 | -0.36821834 | -0.10964992 |
| 15   | NLOC   | 6    | 10    | 0.05313265  | 0.03580272 | 346 | 1.48   | 0.1387 | Tukey-Kramer | 0.9441 | 0.05  | -0.01728571 | 0.123551    | -0.06468126 | 0.17094655  |
| 16   | NLOC   | 6    | 11    | 0.08623322  | 0.03513146 | 346 | 2.45   | 0.0146 | Tukey-Kramer | 0.3725 | 0.05  | 0.01713513  | 0.15533131  | -0.02937181 | 0.20183825  |
| 17   | NLOC   | 6    | 12    | -0.41429185 | 0.03620982 | 346 | -11.44 | 0.0000 | Tukey-Kramer | 0.0000 | 0.05  | -0.48551092 | -0.34307278 | -0.56344539 | -0.29513831 |
| 18   | NLOC   | 6    | 13    | -0.00567128 | 0.03516671 | 346 | -0.16  | 0.8720 | Tukey-Kramer | 1.0000 | 0.05  | -0.07483871 | 0.06349615  | -0.12139232 | 0.11004976  |
| 19   | NLOC   | 6    | 14    | -0.05720905 | 0.0353197  | 346 | -1.62  | 0.1062 | Tukey-Kramer | 0.9009 | 0.05  | -0.12667738 | 0.01225928  | -0.17343351 | 0.05901542  |
| 20   | NLOC   | 6    | 15    | -0.24830412 | 0.03552192 | 346 | -6.99  | 0.0000 | Tukey-Kramer | 0.0000 | 0.05  | -0.31817019 | -0.17843805 | -0.36519402 | -0.13141422 |
| 21   | NLOC   | 6    | 16    | -0.48166693 | 0.03619969 | 346 | -13.31 | 0.0000 | Tukey-Kramer | 0.0000 | 0.05  | -0.55286607 | -0.41046779 | -0.60078714 | -0.36254672 |
| 22   | NLOC   | 7    | 8     | 0.07579255  | 0.03649703 | 346 | 2.08   | 0.0386 | Tukey-Kramer | 0.6398 | 0.05  | 0.00400858  | 0.14757651  | -0.0443061  | 0.1958912   |
| 23   | NLOC   | 7    | 9     | -0.27972278 | 0.04242979 | 346 | -6.59  | 0.0000 | Tukey-Kramer | 0.0000 | 0.05  | -0.36317555 | -0.19627002 | -0.419344   | -0.14010157 |
| 24   | NLOC   | 7    | 10    | 0.01234399  | 0.03513265 | 346 | 0.35   | 0.7255 | Tukey-Kramer | 1.0000 | 0.05  | -0.05675646 | 0.08144443  | -0.10326498 | 0.12795296  |
| 25   | NLOC   | 7    | 11    | 0.04544456  | 0.03579118 | 346 | 1.27   | 0.2050 | Tukey-Kramer | 0.9823 | 0.05  | -0.02495111 | 0.11584023  | -0.07233139 | 0.16322051  |
| 26   | NLOC   | 7    | 12    | -0.45508051 | 0.03522086 | 346 | -12.92 | 0.0000 | Tukey-Kramer | 0.0000 | 0.05  | -0.52435445 | -0.38580657 | -0.57097975 | -0.33918127 |
| 27   | NLOC   | 7    | 13    | -0.04645994 | 0.03600514 | 346 | -1.29  | 0.1978 | Tukey-Kramer | 0.9799 | 0.05  | -0.11727643 | 0.02435656  | -0.16493994 | 0.07202007  |
| 28   | NLOC   | 7    | 14    | -0.09799771 | 0.03649445 | 346 | -2.69  | 0.0076 | Tukey-Kramer | 0.2381 | 0.05  | -0.1697766  | -0.02621882 | -0.21808787 | 0.02209245  |
| 29   | NLOC   | 7    | 15    | -0.28909277 | 0.03695824 | 346 | -7.82  | 0.0000 | Tukey-Kramer | 0.0000 | 0.05  | -0.36178386 | -0.21640169 | -0.41070908 | -0.16747646 |
| 30   | NLOC   | 7    | 16    | -0.52245559 | 0.03544827 | 346 | -14.74 | 0.0000 | Tukey-Kramer | 0.0000 | 0.05  | -0.59217679 | -0.45273438 | -0.63910312 | -0.40580805 |
| 31   | NLOC   | 8    | 9     | -0.35551533 | 0.03777118 | 346 | -9.41  | 0.0000 | Tukey-Kramer | 0.0000 | 0.05  | -0.42980535 | -0.28122532 | -0.47980674 | -0.23122392 |
| 32   | NLOC   | 8    | 10    | -0.06344856 | 0.03670292 | 346 | -1.73  | 0.0848 | Tukey-Kramer | 0.8538 | 0.05  | -0.13563747 | 0.00874035  | -0.1842247  | 0.05732759  |
| 33   | NLOC   | 8    | 11    | -0.03034799 | 0.03525628 | 346 | -0.86  | 0.3900 | Tukey-Kramer | 0.9994 | 0.05  | -0.09969159 | 0.03899562  | -0.14636377 | 0.0856678   |
| 34   | NLOC   | 8    | 12    | -0.53087306 | 0.0372862  | 346 | -14.24 | 0.0000 | Tukey-Kramer | 0.0000 | 0.05  | -0.60420919 | -0.45753692 | -0.65356857 | -0.40817754 |
| 35   | NLOC   | 8    | 13    | -0.12225248 | 0.03518194 | 346 | -3.47  | 0.0006 | Tukey-Kramer | 0.0281 | 0.05  | -0.19144986 | -0.0530551  | -0.23802363 | -0.00648133 |
| 36   | NLOC   | 8    | 14    | -0.17379025 | 0.03512501 | 346 | -4.95  | 0.0000 | Tukey-Kramer | 0.0001 | 0.05  | -0.24287566 | -0.10470485 | -0.28937406 | -0.05820645 |
| 37   | NLOC   | 8    | 15    | -0.36488532 | 0.03516063 | 346 | -10.38 | 0.0000 | Tukey-Kramer | 0.0000 | 0.05  | -0.43404008 | -0.29572984 | -0.48058636 | -0.24918428 |
| 38   | NLOC   | 8    | 16    | -0.59824813 | 0.03714114 | 346 | -16.11 | 0.0000 | Tukey-Kramer | 0.0000 | 0.05  | -0.67129896 | -0.52519731 | -0.72046631 | -0.47602996 |
| 39   | NLOC   | 9    | 10    | 0.29206677  | 0.0428453  | 346 | 6.82   | 0.0000 | Tukey-Kramer | 0.0000 | 0.05  | 0.20779675  | 0.37633679  | 0.15107825  | 0.4330553   |
| 40   | NLOC   | 9    | 11    | 0.32516735  | 0.03899148 | 346 | 8.34   | 0.0000 | Tukey-Kramer | 0.0000 | 0.05  | 0.24847719  | 0.40181575  | 0.19686037  | 0.45347432  |
| 41   | NLOC   | 9    | 12    | -0.17535772 | 0.04393912 | 346 | -3.99  | 0.0001 | Tukey-Kramer | 0.0045 | 0.05  | -0.26177912 | -0.08893633 | -0.31994562 | -0.03076983 |
| 42   | NLOC   | 9    | 13    | 0.2326285   | 0.03855178 | 346 | 6.05   | 0.0000 | Tukey-Kramer | 0.0000 | 0.05  | 0.15743752  | 0.30908818  | 0.10640277  | 0.36012293  |
| 43   | NLOC   | 9    | 14    | 0.18172508  | 0.03777468 | 346 | 4.81   | 0.0000 | Tukey-Kramer | 0.0001 | 0.05  | 0.10742819  | 0.25602197  | 0.05742216  | 0.306028    |
| 44   | NLOC   | 9    | 15    | -0.00936999 | 0.03721841 | 346 | -0.25  | 0.8014 | Tukey-Kramer | 1.0000 | 0.05  | -0.08257278 | 0.06383281  | -0.13184242 | 0.11310244  |
| 45   | NLOC   | 9    | 16    | -0.2427328  | 0.04338442 | 346 | -5.59  | 0.0000 | Tukey-Kramer | 0.0000 | 0.05  | -0.32806319 | -0.15740242 | -0.38549538 | -0.09997022 |
| 46   | NLOC   | 10   | 11    | 0.03310057  | 0.03593916 | 346 | 0.92   | 0.3577 | Tukey-Kramer | 0.9989 | 0.05  | -0.03758614 | 0.10378729  | -0.08516231 | 0.15136346  |
| 47   | NLOC   | 10   | 12    | -0.4674245  | 0.03517442 | 346 | -13.29 | 0.0000 | Tukey-Kramer | 0.0000 | 0.05  | -0.53660708 | -0.39824191 | -0.58317089 | -0.35167811 |
| 48   | NLOC   | 10   | 13    | -0.05880392 | 0.0361733  | 346 | -1.63  | 0.1049 | Tukey-Kramer | 0.8987 | 0.05  | -0.12995116 | 0.01234331  | -0.17783729 | 0.06022944  |
| 49   | NLOC   | 10   | 14    | -0.1103417  | 0.03670016 | 346 | -3.01  | 0.0028 | Tukey-Kramer | 0.1111 | 0.05  | -0.18252519 | -0.0381582  | -0.23110877 | 0.01042538  |
| 50   | NLOC   | 10   | 15    | -0.30143676 | 0.03719277 | 346 | -8.10  | 0.0000 | Tukey-Kramer | 0.0000 | 0.05  | -0.37458914 | -0.22828439 | -0.42382484 | -0.17904869 |
| 51   | NLOC   | 10   | 16    | -0.53479958 | 0.03543016 | 346 | -15.09 | 0.0000 | Tukey-Kramer | 0.0000 | 0.05  | -0.60448518 | -0.46511397 | -0.65138754 | -0.41821161 |
| 52   | NLOC   | 11   | 12    | -0.50052507 | 0.03637924 | 346 | -13.76 | 0.0000 | Tukey-Kramer | 0.0000 | 0.05  | -0.57207736 | -0.42897278 | -0.62023612 | -0.38081402 |
| 53   | NLOC   | 11   | 13    | -0.0919045  | 0.03514037 | 346 | -2.62  | 0.0093 | Tukey-Kramer | 0.2752 | 0.05  | -0.16102011 | -0.02278888 | -0.20753884 | 0.02372985  |
| 54   | NLOC   | 11   | 14    | -0.14344227 | 0.03525546 | 346 | -4.07  | 0.0001 | Tukey-Kramer | 0.0034 | 0.05  | -0.21278426 | -0.07410027 | -0.25945536 | -0.02742917 |
| 55   | NLOC   | 11   | 15    | -0.33453734 | 0.03542781 | 346 | -9.44  | 0.0000 | Tukey-Kramer | 0.0000 | 0.05  | -0.40421831 | -0.26485636 | -0.45111756 | -0.21795711 |
| 56   | NLOC   | 11   | 16    | -0.56790015 | 0.03634407 | 346 | -15.63 | 0.0000 | Tukey-Kramer | 0.0000 | 0.05  | -0.63938325 | -0.49641704 | -0.68749544 | -0.44830486 |
| 57   | NLOC   | 12   | 13    | 0.40862057  | 0.03666342 | 346 | 11.15  | 0.0000 | Tukey-Kramer | 0.0000 | 0.05  | 0.33650934  | 0.4807318   | 0.28797439  | 0.52926675  |
| 58   | NLOC   | 12   | 14    | 0.3570828   | 0.03728301 | 346 | 9.58   | 0.0000 | Tukey-Kramer | 0.0000 | 0.05  | 0.28375294  | 0.43041267  | 0.23439778  | 0.47976783  |
| 59   | NLOC   | 12   | 15    | 0.16598773  | 0.0378465  | 346 | 4.39   | 0.0000 | Tukey-Kramer | 0.0009 | 0.05  | 0.09154958  | 0.24042589  | 0.04144848  | 0.29052699  |
| 60   | NLOC   | 12   | 16    | -0.06737508 | 0.03545242 | 346 | -1.90  | 0.0582 | Tukey-Kramer | 0.7583 | 0.05  | -0.13710446 | 0.0023543   | -0.18403629 | 0.04928613  |
| 61   | NLOC   | 13   | 14    | -0.05153777 | 0.0351814  | 346 | -1.46  | 0.1439 | Tukey-Kramer | 0.9489 | 0.05  | -0.12073409 | 0.01765855  | -0.16730714 | 0.0642316   |
| 62   | NLOC   | 13   | 15    | -0.24263284 | 0.0353073  | 346 | -6.87  | 0.0000 | Tukey-Kramer | 0.0000 | 0.05  | -0.31207678 | -0.1731889  | -0.35881649 | -0.12644919 |
| 63   | NLOC   | 13   | 16    | -0.47599565 | 0.03659006 | 346 | -13.01 | 0.0000 | Tukey-Kramer | 0.0000 | 0.05  | -0.54796259 | -0.40402871 | -0.59640042 | -0.35559088 |
| 64   | NLOC   | 14   | 15    | -0.19109507 | 0.03516106 | 346 | -5.43  | 0.0000 | Tukey-Kramer | 0.0000 | 0.05  | -0.26025139 | -0.12193875 | -0.30679752 | -0.07539262 |
| 65   | NLOC   | 14   | 16    | -0.42445788 | 0.03713829 | 346 | -11.43 | 0.0000 | Tukey-Kramer | 0.0000 | 0.05  | -0.49750309 | -0.35141267 | -0.54666667 | -0.30224909 |
| 66   | NLOC   | 15   | 16    | -0.23336281 | 0.03764667 | 346 | -6.20  | 0.0000 | Tukey-Kramer | 0.0000 | 0.05  | -0.30740794 | -0.15931768 | -0.35724452 | -0.10948111 |

**B)** Least square means of Acrosome length between southern localities. Sample codes in Table 1

[illegible]
