# Supplementary material for: Linking Acrosomal Morphotypes and Genetic Divergence in an Inter-Oceanic Mussel from Pacific and Atlantic Coasts: A Case of Incipient Speciation?
Source: Preprints.org preprint supplement (doi:10.20944/preprints202401.0956.v1), 2024-01-12
Supplement: Supplementary file 4 [file supplementary]

**Table S1.**

**A)** Post hoc Tukey test for mean Acrosome length between all pair comparisons; Adj p is the adjusted p value. 1=Iquique, 2=Antofagasta, 3=Tumbes, 4=Lota, 5=Lebu, 6=Isla Mocha Punta los Piures, 7= Isla Mocha Faro Viejo, 8= Isla Mocha Caleta Derrumbe, 9= Mehuín, 10=Valdivia, 11=Pucatrihue, 12=Chiloé, 13=Punta Pirámide, 14=Puerto Madryn 15=Comodoro Rivadavia, 16=Punta Arenas.

| NORD | Effect | NLOC | _NLOC | Estimate  | StdErr  | DF  | tValue | Probt  | Adjustment | Adj p  |
|------|--------|------|-------|-----------|---------|-----|--------|--------|------------|--------|
| 1    | NLOC   | 1    | 2     | 11.4167   | 16.9172 | 464 | 0.67   | 0.5001 | Tukey      | 1.0000 |
| 2    | NLOC   | 1    | 3     | 19.4833   | 16.9172 | 464 | 1.15   | 0.2500 | Tukey      | 0.9989 |
| 3    | NLOC   | 1    | 4     | -27.1667  | 16.9172 | 464 | -1.61  | 0.1090 | Tukey      | 0.9668 |
| 4    | NLOC   | 1    | 5     | -224.4000 | 16.9172 | 464 | -13.26 | 0.0000 | Tukey      | 0.0000 |
| 5    | NLOC   | 1    | 6     | -207.3333 | 16.9172 | 464 | -12.26 | 0.0000 | Tukey      | 0.0000 |
| 6    | NLOC   | 1    | 7     | -233.7000 | 16.9172 | 464 | -13.81 | 0.0000 | Tukey      | 0.0000 |
| 7    | NLOC   | 1    | 8     | -136.6667 | 16.9172 | 464 | -8.08  | 0.0000 | Tukey      | 0.0000 |
| 8    | NLOC   | 1    | 9     | -186.8167 | 16.9172 | 464 | -11.04 | 0.0000 | Tukey      | 0.0000 |
| 9    | NLOC   | 1    | 10    | -240.3333 | 16.9172 | 464 | -14.21 | 0.0000 | Tukey      | 0.0000 |
| 10   | NLOC   | 1    | 11    | -173.2000 | 16.9172 | 464 | -10.24 | 0.0000 | Tukey      | 0.0000 |
| 11   | NLOC   | 1    | 12    | -382.0167 | 16.9172 | 464 | -22.58 | 0.0000 | Tukey      | 0.0000 |
| 12   | NLOC   | 1    | 13    | -199.0667 | 16.9172 | 464 | -11.77 | 0.0000 | Tukey      | 0.0000 |
| 13   | NLOC   | 1    | 14    | -209.8167 | 16.9172 | 464 | -12.40 | 0.0000 | Tukey      | 0.0000 |
| 14   | NLOC   | 1    | 15    | -284.8500 | 16.9172 | 464 | -16.84 | 0.0000 | Tukey      | 0.0000 |
| 15   | NLOC   | 1    | 16    | -390.6000 | 16.9172 | 464 | -23.09 | 0.0000 | Tukey      | 0.0000 |
| 16   | NLOC   | 2    | 3     | 8.0667    | 16.9172 | 464 | 0.48   | 0.6337 | Tukey      | 1.0000 |
| 17   | NLOC   | 2    | 4     | -38.5833  | 16.9172 | 464 | -2.28  | 0.0230 | Tukey      | 0.6383 |
| 18   | NLOC   | 2    | 5     | -235.8167 | 16.9172 | 464 | -13.94 | 0.0000 | Tukey      | 0.0000 |
| 19   | NLOC   | 2    | 6     | -218.7500 | 16.9172 | 464 | -12.93 | 0.0000 | Tukey      | 0.0000 |
| 20   | NLOC   | 2    | 7     | -245.1167 | 16.9172 | 464 | -14.49 | 0.0000 | Tukey      | 0.0000 |
| 21   | NLOC   | 2    | 8     | -148.0833 | 16.9172 | 464 | -8.75  | 0.0000 | Tukey      | 0.0000 |
| 22   | NLOC   | 2    | 9     | -198.2333 | 16.9172 | 464 | -11.72 | 0.0000 | Tukey      | 0.0000 |
| 23   | NLOC   | 2    | 10    | -251.7500 | 16.9172 | 464 | -14.88 | 0.0000 | Tukey      | 0.0000 |
| 24   | NLOC   | 2    | 11    | -184.6167 | 16.9172 | 464 | -10.91 | 0.0000 | Tukey      | 0.0000 |
| 25   | NLOC   | 2    | 12    | -393.4333 | 16.9172 | 464 | -23.26 | 0.0000 | Tukey      | 0.0000 |
| 26   | NLOC   | 2    | 13    | -210.4833 | 16.9172 | 464 | -12.44 | 0.0000 | Tukey      | 0.0000 |
| 27   | NLOC   | 2    | 14    | -221.2333 | 16.9172 | 464 | -13.08 | 0.0000 | Tukey      | 0.0000 |
| 28   | NLOC   | 2    | 15    | -296.2667 | 16.9172 | 464 | -17.51 | 0.0000 | Tukey      | 0.0000 |
| 29   | NLOC   | 2    | 16    | -402.0167 | 16.9172 | 464 | -23.76 | 0.0000 | Tukey      | 0.0000 |
| 30   | NLOC   | 3    | 4     | -46.6500  | 16.9172 | 464 | -2.76  | 0.0061 | Tukey      | 0.2978 |
| 31   | NLOC   | 3    | 5     | -243.8833 | 16.9172 | 464 | -14.42 | 0.0000 | Tukey      | 0.0000 |
| 32   | NLOC   | 3    | 6     | -226.8167 | 16.9172 | 464 | -13.41 | 0.0000 | Tukey      | 0.0000 |
| 33   | NLOC   | 3    | 7     | -253.1833 | 16.9172 | 464 | -14.97 | 0.0000 | Tukey      | 0.0000 |
| 34   | NLOC   | 3    | 8     | -156.1500 | 16.9172 | 464 | -9.23  | 0.0000 | Tukey      | 0.0000 |
| 35   | NLOC   | 3    | 9     | -206.3000 | 16.9172 | 464 | -12.19 | 0.0000 | Tukey      | 0.0000 |

|    |      |   |    |           |         |     |        |        |       |        |
|----|------|---|----|-----------|---------|-----|--------|--------|-------|--------|
| 36 | NLOC | 3 | 10 | -259.8167 | 16.9172 | 464 | -15.36 | 0.0000 | Tukey | 0.0000 |
| 37 | NLOC | 3 | 11 | -192.6833 | 16.9172 | 464 | -11.39 | 0.0000 | Tukey | 0.0000 |
| 38 | NLOC | 3 | 12 | -401.5000 | 16.9172 | 464 | -23.73 | 0.0000 | Tukey | 0.0000 |
| 39 | NLOC | 3 | 13 | -218.5500 | 16.9172 | 464 | -12.92 | 0.0000 | Tukey | 0.0000 |
| 40 | NLOC | 3 | 14 | -229.3000 | 16.9172 | 464 | -13.55 | 0.0000 | Tukey | 0.0000 |
| 41 | NLOC | 3 | 15 | -304.3333 | 16.9172 | 464 | -17.99 | 0.0000 | Tukey | 0.0000 |
| 42 | NLOC | 3 | 16 | -410.0833 | 16.9172 | 464 | -24.24 | 0.0000 | Tukey | 0.0000 |
| 43 | NLOC | 4 | 5  | -197.2333 | 16.9172 | 464 | -11.66 | 0.0000 | Tukey | 0.0000 |
| 44 | NLOC | 4 | 6  | -180.1667 | 16.9172 | 464 | -10.65 | 0.0000 | Tukey | 0.0000 |
| 45 | NLOC | 4 | 7  | -206.5333 | 16.9172 | 464 | -12.21 | 0.0000 | Tukey | 0.0000 |
| 46 | NLOC | 4 | 8  | -109.5000 | 16.9172 | 464 | -6.47  | 0.0000 | Tukey | 0.0000 |
| 47 | NLOC | 4 | 9  | -159.6500 | 16.9172 | 464 | -9.44  | 0.0000 | Tukey | 0.0000 |
| 48 | NLOC | 4 | 10 | -213.1667 | 16.9172 | 464 | -12.60 | 0.0000 | Tukey | 0.0000 |
| 49 | NLOC | 4 | 11 | -146.0333 | 16.9172 | 464 | -8.63  | 0.0000 | Tukey | 0.0000 |
| 50 | NLOC | 4 | 12 | -354.8500 | 16.9172 | 464 | -20.98 | 0.0000 | Tukey | 0.0000 |
| 51 | NLOC | 4 | 13 | -171.9000 | 16.9172 | 464 | -10.16 | 0.0000 | Tukey | 0.0000 |
| 52 | NLOC | 4 | 14 | -182.6500 | 16.9172 | 464 | -10.80 | 0.0000 | Tukey | 0.0000 |
| 53 | NLOC | 4 | 15 | -257.6833 | 16.9172 | 464 | -15.23 | 0.0000 | Tukey | 0.0000 |
| 54 | NLOC | 4 | 16 | -363.4333 | 16.9172 | 464 | -21.48 | 0.0000 | Tukey | 0.0000 |
| 55 | NLOC | 5 | 6  | 17.0667   | 16.9172 | 464 | 1.01   | 0.3136 | Tukey | 0.9998 |
| 56 | NLOC | 5 | 7  | -9.3000   | 16.9172 | 464 | -0.55  | 0.5828 | Tukey | 1.0000 |
| 57 | NLOC | 5 | 8  | 87.7333   | 16.9172 | 464 | 5.19   | 0.0000 | Tukey | 0.0000 |
| 58 | NLOC | 5 | 9  | 37.5833   | 16.9172 | 464 | 2.22   | 0.0268 | Tukey | 0.6814 |
| 59 | NLOC | 5 | 10 | -15.9333  | 16.9172 | 464 | -0.94  | 0.3468 | Tukey | 0.9999 |
| 60 | NLOC | 5 | 11 | 51.2000   | 16.9172 | 464 | 3.03   | 0.0026 | Tukey | 0.1620 |
| 61 | NLOC | 5 | 12 | -157.6167 | 16.9172 | 464 | -9.32  | 0.0000 | Tukey | 0.0000 |
| 62 | NLOC | 5 | 13 | 25.3333   | 16.9172 | 464 | 1.50   | 0.1349 | Tukey | 0.9825 |
| 63 | NLOC | 5 | 14 | 14.5833   | 16.9172 | 464 | 0.86   | 0.3891 | Tukey | 1.0000 |
| 64 | NLOC | 5 | 15 | -60.4500  | 16.9172 | 464 | -3.57  | 0.0004 | Tukey | 0.0332 |
| 65 | NLOC | 5 | 16 | -166.2000 | 16.9172 | 464 | -9.82  | 0.0000 | Tukey | 0.0000 |
| 66 | NLOC | 6 | 7  | -26.3667  | 16.9172 | 464 | -1.56  | 0.1198 | Tukey | 0.9746 |
| 67 | NLOC | 6 | 8  | 70.6667   | 16.9172 | 464 | 4.18   | 0.0000 | Tukey | 0.0036 |
| 68 | NLOC | 6 | 9  | 20.5167   | 16.9172 | 464 | 1.21   | 0.2258 | Tukey | 0.9980 |
| 69 | NLOC | 6 | 10 | -33.0000  | 16.9172 | 464 | -1.95  | 0.0517 | Tukey | 0.8505 |
| 70 | NLOC | 6 | 11 | 34.1333   | 16.9172 | 464 | 2.02   | 0.0442 | Tukey | 0.8144 |
| 71 | NLOC | 6 | 12 | -174.6833 | 16.9172 | 464 | -10.33 | 0.0000 | Tukey | 0.0000 |
| 72 | NLOC | 6 | 13 | 8.2667    | 16.9172 | 464 | 0.49   | 0.6253 | Tukey | 1.0000 |
| 73 | NLOC | 6 | 14 | -2.4833   | 16.9172 | 464 | -0.15  | 0.8834 | Tukey | 1.0000 |
| 74 | NLOC | 6 | 15 | -77.5167  | 16.9172 | 464 | -4.58  | 0.0000 | Tukey | 0.0007 |
| 75 | NLOC | 6 | 16 | -183.2667 | 16.9172 | 464 | -10.83 | 0.0000 | Tukey | 0.0000 |
| 76 | NLOC | 7 | 8  | 97.0333   | 16.9172 | 464 | 5.74   | 0.0000 | Tukey | 0.0000 |
| 77 | NLOC | 7 | 9  | 46.8833   | 16.9172 | 464 | 2.77   | 0.0058 | Tukey | 0.2895 |
| 78 | NLOC | 7 | 10 | -6.6333   | 16.9172 | 464 | -0.39  | 0.6952 | Tukey | 1.0000 |

|     |      |    |    |           |         |     |        |        |       |        |
|-----|------|----|----|-----------|---------|-----|--------|--------|-------|--------|
| 79  | NLOC | 7  | 11 | 60.5000   | 16.9172 | 464 | 3.58   | 0.0004 | Tukey | 0.0328 |
| 80  | NLOC | 7  | 12 | -148.3167 | 16.9172 | 464 | -8.77  | 0.0000 | Tukey | 0.0000 |
| 81  | NLOC | 7  | 13 | 34.6333   | 16.9172 | 464 | 2.05   | 0.0412 | Tukey | 0.7971 |
| 82  | NLOC | 7  | 14 | 23.8833   | 16.9172 | 464 | 1.41   | 0.1587 | Tukey | 0.9901 |
| 83  | NLOC | 7  | 15 | -51.1500  | 16.9172 | 464 | -3.02  | 0.0026 | Tukey | 0.1632 |
| 84  | NLOC | 7  | 16 | -156.9000 | 16.9172 | 464 | -9.27  | 0.0000 | Tukey | 0.0000 |
| 85  | NLOC | 8  | 9  | -50.1500  | 16.9172 | 464 | -2.96  | 0.0032 | Tukey | 0.1885 |
| 86  | NLOC | 8  | 10 | -103.6667 | 16.9172 | 464 | -6.13  | 0.0000 | Tukey | 0.0000 |
| 87  | NLOC | 8  | 11 | -36.5333  | 16.9172 | 464 | -2.16  | 0.0313 | Tukey | 0.7249 |
| 88  | NLOC | 8  | 12 | -245.3500 | 16.9172 | 464 | -14.50 | 0.0000 | Tukey | 0.0000 |
| 89  | NLOC | 8  | 13 | -62.4000  | 16.9172 | 464 | -3.69  | 0.0003 | Tukey | 0.0225 |
| 90  | NLOC | 8  | 14 | -73.1500  | 16.9172 | 464 | -4.32  | 0.0000 | Tukey | 0.0020 |
| 91  | NLOC | 8  | 15 | -148.1833 | 16.9172 | 464 | -8.76  | 0.0000 | Tukey | 0.0000 |
| 92  | NLOC | 8  | 16 | -253.9333 | 16.9172 | 464 | -15.01 | 0.0000 | Tukey | 0.0000 |
| 93  | NLOC | 9  | 10 | -53.5167  | 16.9172 | 464 | -3.16  | 0.0017 | Tukey | 0.1136 |
| 94  | NLOC | 9  | 11 | 13.6167   | 16.9172 | 464 | 0.80   | 0.4213 | Tukey | 1.0000 |
| 95  | NLOC | 9  | 12 | -195.2000 | 16.9172 | 464 | -11.54 | 0.0000 | Tukey | 0.0000 |
| 96  | NLOC | 9  | 13 | -12.2500  | 16.9172 | 464 | -0.72  | 0.4694 | Tukey | 1.0000 |
| 97  | NLOC | 9  | 14 | -23.0000  | 16.9172 | 464 | -1.36  | 0.1746 | Tukey | 0.9933 |
| 98  | NLOC | 9  | 15 | -98.0333  | 16.9172 | 464 | -5.79  | 0.0000 | Tukey | 0.0000 |
| 99  | NLOC | 9  | 16 | -203.7833 | 16.9172 | 464 | -12.05 | 0.0000 | Tukey | 0.0000 |
| 100 | NLOC | 10 | 11 | 67.1333   | 16.9172 | 464 | 3.97   | 0.0001 | Tukey | 0.0082 |
| 101 | NLOC | 10 | 12 | -141.6833 | 16.9172 | 464 | -8.38  | 0.0000 | Tukey | 0.0000 |
| 102 | NLOC | 10 | 13 | 41.2667   | 16.9172 | 464 | 2.44   | 0.0151 | Tukey | 0.5188 |
| 103 | NLOC | 10 | 14 | 30.5167   | 16.9172 | 464 | 1.80   | 0.0719 | Tukey | 0.9141 |
| 104 | NLOC | 10 | 15 | -44.5167  | 16.9172 | 464 | -2.63  | 0.0088 | Tukey | 0.3793 |
| 105 | NLOC | 10 | 16 | -150.2667 | 16.9172 | 464 | -8.88  | 0.0000 | Tukey | 0.0000 |
| 106 | NLOC | 11 | 12 | -208.8167 | 16.9172 | 464 | -12.34 | 0.0000 | Tukey | 0.0000 |
| 107 | NLOC | 11 | 13 | -25.8667  | 16.9172 | 464 | -1.53  | 0.1269 | Tukey | 0.9787 |
| 108 | NLOC | 11 | 14 | -36.6167  | 16.9172 | 464 | -2.16  | 0.0309 | Tukey | 0.7216 |
| 109 | NLOC | 11 | 15 | -111.6500 | 16.9172 | 464 | -6.60  | 0.0000 | Tukey | 0.0000 |
| 110 | NLOC | 11 | 16 | -217.4000 | 16.9172 | 464 | -12.85 | 0.0000 | Tukey | 0.0000 |
| 111 | NLOC | 12 | 13 | 182.9500  | 16.9172 | 464 | 10.81  | 0.0000 | Tukey | 0.0000 |
| 112 | NLOC | 12 | 14 | 172.2000  | 16.9172 | 464 | 10.18  | 0.0000 | Tukey | 0.0000 |
| 113 | NLOC | 12 | 15 | 97.1667   | 16.9172 | 464 | 5.74   | 0.0000 | Tukey | 0.0000 |
| 114 | NLOC | 12 | 16 | -8.5833   | 16.9172 | 464 | -0.51  | 0.6121 | Tukey | 1.0000 |
| 115 | NLOC | 13 | 14 | -10.7500  | 16.9172 | 464 | -0.64  | 0.5255 | Tukey | 1.0000 |
| 116 | NLOC | 13 | 15 | -85.7833  | 16.9172 | 464 | -5.07  | 0.0000 | Tukey | 0.0001 |
| 117 | NLOC | 13 | 16 | -191.5333 | 16.9172 | 464 | -11.32 | 0.0000 | Tukey | 0.0000 |
| 118 | NLOC | 14 | 15 | -75.0333  | 16.9172 | 464 | -4.44  | 0.0000 | Tukey | 0.0012 |
| 119 | NLOC | 14 | 16 | -180.7833 | 16.9172 | 464 | -10.69 | 0.0000 | Tukey | 0.0000 |
| 120 | NLOC | 15 | 16 | -105.7500 | 16.9172 | 464 | -6.25  | 0.0000 | Tukey | 0.0000 |

**B) Matrix for pairwise comparisons of the Adjusted P value of mean Acrosome length. Sample codes in Table 1**

| Locality | IQQ    | ANT    | TUMB   | LOTA   | LEBU   | IMLP   | IMFV   | IMCD   | MEH    | VALD   | PUCA   | CHIL   | PIR    | PM     | CR     | PARE   |
|----------|--------|--------|--------|--------|--------|--------|--------|--------|--------|--------|--------|--------|--------|--------|--------|--------|
| IQQ      | 1      | 1.0000 | 0.9989 | 0.9668 | 0.0000 | 0.0000 | 0.0000 | 0.0000 | 0.0000 | 0.0000 | 0.0000 | 0.0000 | 0.0000 | 0.0000 | 0.0000 | 0.0000 |
| ANT      | 1.0000 | 1      | 1.0000 | 0.6383 | 0.0000 | 0.0000 | 0.0000 | 0.0000 | 0.0000 | 0.0000 | 0.0000 | 0.0000 | 0.0000 | 0.0000 | 0.0000 | 0.0000 |
| TUMB     | 0.9989 | 1.0000 | 1      | 0.2978 | 0.0000 | 0.0000 | 0.0000 | 0.0000 | 0.0000 | 0.0000 | 0.0000 | 0.0000 | 0.0000 | 0.0000 | 0.0000 | 0.0000 |
| LOTA     | 0.9668 | 0.6383 | 0.2978 | 1      | 0.0000 | 0.0000 | 0.0000 | 0.0000 | 0.0000 | 0.0000 | 0.0000 | 0.0000 | 0.0000 | 0.0000 | 0.0000 | 0.0000 |
| LEBU     | 0.0000 | 0.0000 | 0.0000 | 0.0000 | 1      | 0.9998 | 1.0000 | 0.0000 | 0.6814 | 0.9999 | 0.1620 | 0.0000 | 0.9825 | 1.0000 | 0.0332 | 0.0000 |
| IMLP     | 0.0000 | 0.0000 | 0.0000 | 0.0000 | 0.9998 | 1      | 0.9746 | 0.0036 | 0.9980 | 0.8505 | 0.8144 | 0.0000 | 1.0000 | 1.0000 | 0.0007 | 0.0000 |
| IMFV     | 0.0000 | 0.0000 | 0.0000 | 0.0000 | 1.0000 | 0.9746 | 1      | 0.0000 | 0.2895 | 1.0000 | 0.0328 | 0.0000 | 0.7971 | 0.9901 | 0.1632 | 0.0000 |
| IMCD     | 0.0000 | 0.0000 | 0.0000 | 0.0000 | 0.0000 | 0.0036 | 0.0000 | 1      | 0.1885 | 0.0000 | 0.7249 | 0.0000 | 0.0225 | 0.0020 | 0.0000 | 0.0000 |
| MEH      | 0.0000 | 0.0000 | 0.0000 | 0.0000 | 0.6814 | 0.9980 | 0.2895 | 0.1885 | 1      | 0.1136 | 1.0000 | 0.0000 | 1.0000 | 0.9933 | 0.0000 | 0.0000 |
| VALD     | 0.0000 | 0.0000 | 0.0000 | 0.0000 | 0.9999 | 0.8505 | 1.0000 | 0.0000 | 0.1136 | 1      | 0.0082 | 0.0000 | 0.5188 | 0.9141 | 0.3793 | 0.0000 |
| PUCA     | 0.0000 | 0.0000 | 0.0000 | 0.0000 | 0.1620 | 0.8144 | 0.0328 | 0.7249 | 1.0000 | 0.0082 | 1      | 0.0000 | 0.9787 | 0.7216 | 0.0000 | 0.0000 |
| CHIL     | 0.0000 | 0.0000 | 0.0000 | 0.0000 | 0.0000 | 0.0000 | 0.0000 | 0.0000 | 0.0000 | 0.0000 | 0.0000 | 1      | 0.0000 | 0.0000 | 0.0000 | 1.0000 |
| PIR      | 0.0000 | 0.0000 | 0.0000 | 0.0000 | 0.9825 | 1.0000 | 0.7971 | 0.0225 | 1.0000 | 0.5188 | 0.9787 | 0.0000 | 1      | 1.0000 | 0.0001 | 0.0000 |
| PM       | 0.0000 | 0.0000 | 0.0000 | 0.0000 | 1.0000 | 1.0000 | 0.9901 | 0.0020 | 0.9933 | 0.9141 | 0.7216 | 0.0000 | 1.0000 | 1      | 0.0012 | 0.0000 |
| CR       | 0.0000 | 0.0000 | 0.0000 | 0.0000 | 0.0332 | 0.0007 | 0.1632 | 0.0000 | 0.0000 | 0.3793 | 0.0000 | 0.0000 | 0.0001 | 0.0012 | 1      | 0.0000 |
| PARE     | 0.0000 | 0.0000 | 0.0000 | 0.0000 | 0.0000 | 0.0000 | 0.0000 | 0.0000 | 0.0000 | 0.0000 | 0.0000 | 1.0000 | 0.0000 | 0.0000 | 0.0000 | 1      |
